# Supplementary material
Source: MDPI journal article supplement (https://www.mdpi.com/2073-4441/10/7/842)
Supplement: s1 [file s1]

## Sheet: OTU表
Domain	Kingdom	Phylum	Class	Order	Family	Genus	Species	OTU	OTAW4_1608	MW3_1608	MW17_1608	MW10_1608	PM4_1608	PM7_1608	MW13_1608	MW6_1608	MW5_1608	MW7_1608	MW4_1608	SUM
d__Bacteria	k__norank_d__Bacteria	p__Firmicutes	c__Clostridia	o__Clostridiales	f__Syntrophomonadaceae	g__Syntrophomonas	s__uncultured_bacterium_g__Syntrophomonas	OTU537	0	0	0	4	4	1	0	0	0	0	0	9
d__Bacteria	k__norank_d__Bacteria	p__Firmicutes	c__Clostridia	o__Clostridiales	f__Peptococcaceae	g__Pelotomaculum	s__unclassified_g__Pelotomaculum	OTU292	0	0	0	0	0	0	0	0	9	0	0	9
d__Bacteria	k__norank_d__Bacteria	p__Firmicutes	c__Clostridia	o__Clostridiales	f__Peptococcaceae	g__Pelotomaculum	s__uncultured_bacterium_g__Pelotomaculum	OTU382	0	0	0	0	1	0	0	0	35	3	0	39
d__Bacteria	k__norank_d__Bacteria	p__Firmicutes	c__Clostridia	o__Clostridiales	f__Syntrophomonadaceae	g__Syntrophomonas	s__unclassified_g__Syntrophomonas	OTU9	0	5	6	4	112	0	0	1	1	0	0	129
d__Bacteria	k__norank_d__Bacteria	p__Firmicutes	c__Clostridia	o__Clostridiales	f__Peptococcaceae	g__Pelotomaculum	s__uncultured_Peptococcaceae_bacterium_g__Pelotomaculum	OTU2	7	171	18	80	67	2	0	131	44	9	0	529
d__Bacteria	k__norank_d__Bacteria	p__Proteobacteria	c__Deltaproteobacteria	o__Syntrophobacterales	f__Syntrophaceae	g__Syntrophus	s__unclassified_g__Syntrophus	OTU327	0	0	0	0	0	0	0	0	4	0	0	4
d__Bacteria	k__norank_d__Bacteria	p__Proteobacteria	c__Deltaproteobacteria	o__Syntrophobacterales	f__Syntrophobacteraceae	g__Desulfovirga	s__uncultured_bacterium_g__Desulfovirga	OTU287	0	0	0	0	0	0	0	0	70	0	0	70
d__Bacteria	k__norank_d__Bacteria	p__Proteobacteria	c__Deltaproteobacteria	o__Syntrophobacterales	f__Syntrophaceae	g__Smithella	s__uncultured_Syntrophaceae_bacterium_g__Smithella	OTU286	0	47	93	2	35	1	10	1	49	25	4	267
d__Bacteria	k__norank_d__Bacteria	p__Proteobacteria	c__Deltaproteobacteria	o__Syntrophobacterales	f__Syntrophaceae	g__Syntrophus	s__uncultured_prokaryote_g__Syntrophus	OTU390	2	197	19	4	124	1	10	0	215	214	1	787
d__Bacteria	k__norank_d__Bacteria	p__Proteobacteria	c__Deltaproteobacteria	o__Syntrophobacterales	f__Syntrophaceae	g__norank_f__Syntrophaceae	s__unclassified_g__norank_f__Syntrophaceae	OTU135	0	8	1	0	0	0	0	0	0	0	0	9
d__Bacteria	k__norank_d__Bacteria	p__Proteobacteria	c__Deltaproteobacteria	o__Syntrophobacterales	f__Syntrophaceae	g__Syntrophus	s__uncultured_delta_proteobacterium_g__Syntrophus	OTU471	0	0	0	0	1	0	0	0	33	1	2	37
